# Supplementary material for: Trajectories of Emotional Symptoms and Peer Relationship Problems in Children after Nuclear Disaster: Evidence from the Fukushima Health Management Survey
Source: PubMed Central journal article supplement (PMC5800181; doi:10.3390/ijerph15010082), 2018-01-06
Supplement: ijerph-15-00082-s001.pdf [file ijerph-15-00082-s001.pdf]

**Table S1. Gender differences in emotional symptoms**

| Fiscal Year | Girls |      |      | Boys |      |      | <i>t</i> -value | P     |
|-------------|-------|------|------|------|------|------|-----------------|-------|
|             | N     | Mean | SD   | N    | Mean | SD   |                 |       |
| 2011        | 3633  | 2.58 | 2.42 | 3798 | 2.40 | 2.35 | -3.20           | 0.001 |
| 2012        | 2239  | 2.22 | 2.25 | 2320 | 1.94 | 2.14 | -4.39           | 0.000 |
| 2013        | 1872  | 2.06 | 2.16 | 1899 | 1.78 | 2.05 | -3.99           | 0.000 |

**Table S2 Sociodemographic characteristics among the trajectory groups****a) The emotional symptoms**

| Groups                             | Minimum<br>N(%) | Low<br>N(%) | Moderate<br>N(%) | Very severe<br>N(%) | df | $\chi^2$ | p      |
|------------------------------------|-----------------|-------------|------------------|---------------------|----|----------|--------|
| <b>Gender</b>                      |                 |             |                  |                     |    |          |        |
| Female                             | 294 (41.5)      | 2005 (48.0) | 1420 (51.5)      | 350 (54.9)          | 3  | 33.4     | <0.001 |
| Male                               | 415 (58.5)      | 2173 (52.0) | 1337 (48.5)      | 288 (45.1)          |    |          |        |
| <b>Age at the time of disaster</b> |                 |             |                  |                     |    |          |        |
| 9 years or younger                 | 328 (46.3)      | 2033 (48.7) | 1503 (54.5)      | 337 (52.8)          | 3  | 29.8     | <0.001 |
| 10 years or older                  | 381 (53.7)      | 2145 (51.3) | 1254 (45.5)      | 301 (47.2)          |    |          |        |
| <b>Experience of disaster</b>      |                 |             |                  |                     |    |          |        |
| Tsunami (+)                        | 71 (10.6)       | 401 (10.6)  | 312 (12.6)       | 95 (16.3)           | 3  | 18.9     | <0.001 |

|                                                |            |             |             |            |   |      |        |
|------------------------------------------------|------------|-------------|-------------|------------|---|------|--------|
| Tsunami (-)                                    | 598 (89.4) | 3365 (89.4) | 2156 (87.4) | 487 (83.7) |   |      |        |
| Heard the sound of nuclear plant explosion (+) | 242 (36.2) | 1399 (37.1) | 1023 (41.5) | 307 (52.7) | 3 | 58.3 | <0.001 |
| Heard the sound of nuclear plant explosion (-) | 427 (63.8) | 2367 (62.9) | 1445 (58.5) | 275 (47.3) |   |      |        |
| <b>Living place in 2011</b>                    |            |             |             |            |   |      |        |
| Outside Fukushima prefecture                   | 116 (17.5) | 705 (18.8)  | 545 (22.2)  | 147 (25.2) | 3 | 22.3 | <0.001 |
| Inside Fukushima prefecture                    | 547 (82.5) | 3042 (81.2) | 1911 (77.8) | 437 (74.8) |   |      |        |
| <b>Exercise habit in 2011</b>                  |            |             |             |            |   |      |        |
| Very little                                    | 293 (43.9) | 1883 (50.0) | 1424 (57.7) | 367 (62.7) | 3 | 80.1 | <0.001 |
| Once a week or more                            | 375 (56.1) | 1883 (50.0) | 1044 (42.3) | 218 (37.3) |   |      |        |

#### b) The peer relationship problems

| <b>Groups</b> | <b>Low<br/>N(%)</b> | <b>Moderate<br/>N(%)</b> | <b>Very severe<br/>N(%)</b> | <b>df</b> | <b><math>\chi^2</math></b> | <b>p</b> |
|---------------|---------------------|--------------------------|-----------------------------|-----------|----------------------------|----------|
| <b>Gender</b> |                     |                          |                             |           |                            |          |
| Female        | 911 (48.9)          | 2872 (50.2)              | 286 (40.8)                  | 2         | 22.3                       | p<0.001  |
| Male          | 952 (51.1)          | 2846 (49.8)              | 415 (59.2)                  |           |                            |          |

|                                                   |             |             |            |   |      |        |
|---------------------------------------------------|-------------|-------------|------------|---|------|--------|
| <b>Age at the time of disaster</b>                |             |             |            |   |      |        |
| 9 years or younger                                | 944 (50.7)  | 2913 (50.9) | 344 (49.1) | 2 | 0.9  | 0.65   |
| 10 years or older                                 | 919 (49.3)  | 2805 (49.1) | 357 (50.9) |   |      |        |
| <b>Experience of disaster</b>                     |             |             |            |   |      |        |
| Tsunami (+)                                       | 183 (10.6)  | 612 (11.9)  | 84 (13.7)  | 2 | 4.5  | 0.11   |
| Tsunami (-)                                       | 1538 (89.4) | 4541 (88.1) | 527 (86.3) |   |      |        |
| <b>Heard the sound of nuclear plant explosion</b> |             |             |            |   |      |        |
| (+)                                               | 626 (36.4)  | 2073 (40.2) | 272 (44.5) | 2 | 14.5 | 0.001  |
| (-)                                               | 1095 (63.6) | 3080 (59.8) | 339 (55.5) |   |      |        |
| <b>Living place in 2011</b>                       |             |             |            |   |      |        |
| Outside Fukushima prefecture                      | 356 (20.8)  | 1026 (20.0) | 131(21.5)  | 2 | 1.1  | 0.6    |
| Inside Fukushima prefecture                       | 1355 (79.2) | 4105 (80.0) | 477 (78.5) |   |      |        |
| <b>Exercise habit in 2011</b>                     |             |             |            |   |      |        |
| Very little                                       | 760 (44.2)  | 2825 (54.8) | 382 (62.4) | 2 | 81.7 | <0.001 |
| Once a week or more                               | 959 (55.8)  | 2331(45.2)  | 230 (37.6) |   |      |        |

---
